# Supplementary material for: The Associations between Insomnia Severity and Health Outcomes in the United States
Source: MDPI journal article supplement (doi:10.3390/jcm12062438), 2023-03-22
Supplement: s1 [file s1]

# Supplementary Materials

**Table S1.** Unadjusted outcome differences between insomnia, diagnosed and insomnia, experiencing.

|                                             | Insomnia, Diagnosed |       |       | Insomnia, Experiencing |       |       | Good Sleepers |       |       | p Value |
|---------------------------------------------|---------------------|-------|-------|------------------------|-------|-------|---------------|-------|-------|---------|
|                                             | (n = 2445)          |       |       | (n = 6475)             |       |       | (n = 39,262)  |       |       |         |
|                                             | n                   | Mean  | SD    | n                      | Mean  | SD    | n             | Mean  | SD    |         |
| SF-6D                                       | 2445                | 0.64  | 0.13  | 6475                   | 0.68  | 0.12  | 39,262        | 0.75  | 0.14  | <0.001  |
| PCS                                         | 2445                | 47.30 | 10.72 | 6475                   | 51.15 | 9.10  | 39,262        | 52.24 | 8.43  | <0.001  |
| MCS                                         | 2445                | 40.27 | 13.04 | 6475                   | 43.37 | 12.11 | 39,262        | 48.77 | 10.66 | <0.001  |
| EQ-5D                                       | 2445                | 0.73  | 0.17  | 6475                   | 0.80  | 0.15  | 39,262        | 0.87  | 0.15  | <0.001  |
| Absenteeism %                               | 1278                | 11.47 | 23.47 | 3796                   | 7.22  | 17.67 | 23,856        | 7.19  | 18.09 | <0.001  |
| Presenteeism %                              | 1242                | 30.65 | 29.05 | 3787                   | 21.61 | 27.09 | 23,811        | 17.8  | 28.28 | <0.001  |
| Total work productivity impairment %        | 1235                | 33.70 | 31.29 | 3761                   | 23.84 | 29.24 | 23,694        | 20.41 | 30.69 | <0.001  |
| Activity impairment %                       | 2445                | 38.89 | 30.12 | 6475                   | 26.13 | 27.77 | 39,262        | 18.97 | 27.41 | <0.001  |
| Number of HCP visits in past 6 months       | 2445                | 5.91  | 7.57  | 6475                   | 3.37  | 4.75  | 39,262        | 2.41  | 4.1   | <0.001  |
| Number of ER visits in past 6 months        | 2445                | 0.38  | 1.08  | 6475                   | 0.25  | 0.85  | 39,262        | 0.22  | 1.18  | <0.001  |
| Number of hospitalizations in past 6 months | 2445                | 0.19  | 0.68  | 6475                   | 0.16  | 1.09  | 39,262        | 0.17  | 1.24  | 0.718   |

Abbreviations: ER, emergency room; EQ-5D, EuroQol-5D; HCP, healthcare provider; MCS, mental component score; PCS, physical component score; SD, standard deviation; SF-6D, Short Form-6 Dimensions.

**Table S2.** Adjusted outcome differences between insomnia diagnosed and insomnia experiencing.

|                                             | Insomnia, Diagnosed |      |             |    | Insomnia, Experiencing |      |             |        | p Value |
|---------------------------------------------|---------------------|------|-------------|----|------------------------|------|-------------|--------|---------|
|                                             | (n = 2365)          |      |             |    | (n = 6191)             |      |             |        |         |
|                                             | Mean                | SE   | 95% Wald CI | B  | Mean                   | SE   | 95% Wald CI | B      |         |
| SF-6D                                       | 0.67                | 0.00 | 0.67–0.68   | 0  | 0.67                   | 0.00 | 0.67–0.68   | –0.001 | 0.743   |
| EQ-5D                                       | 0.78                | 0.00 | 0.77–0.78   | 0  | 0.78                   | 0.00 | 0.78–0.79   | 0.008  | 0.032   |
| PCS                                         | 49.55               | 0.19 | 49.17–49.93 | 0  | 50.47                  | 0.11 | 50.25–50.68 | 0.918  | <0.001  |
| MCS                                         | 43.22               | 0.24 | 42.74–43.69 | 0  | 42.44                  | 0.14 | 42.17–42.71 | –0.773 | 0.009   |
|                                             |                     |      |             | RR |                        |      |             | RR     |         |
| Absenteeism (%)                             | 6.48                | 0.64 | 5.34–7.85   | 1  | 5.70                   | 0.30 | 5.15–6.32   | 0.881  | 0.283   |
| Presenteeism (%)                            | 21.88               | 0.91 | 20.17–23.73 | 1  | 20.33                  | 0.45 | 19.47–21.22 | 0.929  | 0.137   |
| Total work productivity impairment (%)      | 23.88               | 0.98 | 22.04–25.89 | 1  | 22.40                  | 0.49 | 21.47–23.38 | 0.938  | 0.192   |
| Activity impairment (%)                     | 27.01               | 0.68 | 25.70–28.38 | 1  | 26.03                  | 0.38 | 25.31–26.78 | 0.964  | 0.235   |
| Number of HCP visits in past 6 months       | 4.03                | 0.12 | 3.80–4.28   | 1  | 3.54                   | 0.06 | 3.42–3.66   | 0.878  | <0.001  |
| Number of ER visits in past 6 months        | 0.22                | 0.02 | 0.19–0.25   | 1  | 0.20                   | 0.01 | 0.19–0.22   | 0.939  | 0.494   |
| Number of hospitalizations in past 6 months | 0.10                | 0.01 | 0.08–0.12   | 1  | 0.10                   | 0.01 | 0.08–0.11   | 0.982  | 0.892   |

Abbreviations: B, Beta coefficient; CI, Confidence Interval; ER, emergency room; EQ-5D, EuroQol-5D; HCP, healthcare provider; ISI, Insomnia Severity Index; MCS, mental component score; PCS, physical component score; RR, rate ratio; SE, standard error; SF-6D, Short Form-6 Dimensions.

## Cost-Related Supplementary Materials

### Methodology for Cost Calculation

To provide further insight into the burden of insomnia from the payer perspective, direct and indirect costs were estimated using a previously validated cost analysis approach [1,2]. First, annual direct costs were calculated by imputing the average costs for the ER visits, hospitalizations, and healthcare provider visits using unit costs for each type of HCRU based on costs from the 2018 Medical Expenditure Panel Survey (MEPS) database. Next, all costs were adjusted to 2020 U.S. dollars based on the Consumer Price Index (CPI) from the Organization for Economic Co-operation and Development (OECD). Costs were then annualized. For each respondent, the number of ER visits, hospitalizations, and physician visits were multiplied by their respective unit costs to determine six-month costs for each type of HCRU; these costs were then doubled to estimate annual costs. Finally, costs of ER visits, hospitalizations, and physician visits were summed to determine total direct costs.

Annual indirect costs were calculated based on WPAI scores using the human capital method and integrating data from the 2020 Bureau of Labor Statistics (BLS) and the WPAI-GH instrument for hours missed at work and impairment at work. To dollarize these

productivity losses, median weekly wages by age and sex were obtained from the BLS, and an hourly wage was estimated. Next, for each respondent, the number of hours they missed due to absenteeism and presenteeism was multiplied by their associated hourly wage, based on their age and sex. These figures were then annualized by multiplying by 50 work weeks in a year. The annual costs for absenteeism and presenteeism are reported separately and also combined to determine total indirect costs.

**Table S3.** Unit cost per visit calculation.

| HRU by Age Group              | MEPS Unit Cost Non-Inflated<br>(USD 2018) | Unit Cost Inflated<br>(USD 2020) |
|-------------------------------|-------------------------------------------|----------------------------------|
| Office-based physician visits | 18–44                                     | 301                              |
|                               | 45–64                                     | 343                              |
|                               | 65+                                       | 279                              |
| Emergency room visits         | 18–44                                     | 1156                             |
|                               | 45–64                                     | 1202                             |
|                               | 65+                                       | 804                              |
| Inpatient stays               | 18–44                                     | 13,876                           |
|                               | 45–64                                     | 18,523                           |
|                               | 65+                                       | 13,495                           |

Cost of annual doctor visits = mean expenditure per doctor visit CPI number of doctor visits in NHWS 2  
Cost of annual ER visits = mean expenditure per ER visit CPI number of ER visits in NHWS 2  
Cost of annual hospital visits = mean expenditure per hospital visit CPI number of hospital visits in NHWS 2  
CPI, consumer price index; ER, emergency room; HRU, healthcare resource use; MEPS, medical expenditure panel survey; NHWS, national health and wellness survey; USD, United-States dollar.

**Table S4.** Weekly wages estimate in US 2020.

| Age, Years | Median Weekly Wages in 2020 |         |
|------------|-----------------------------|---------|
|            | Males                       | Females |
| 16–24      | \$622                       | \$589   |
| 25–34      | \$952                       | \$852   |
| 35–44      | \$1205                      | \$978   |
| 45–54      | \$1260                      | \$977   |
| 55–64      | \$1228                      | \$955   |
| 65+        | \$1115                      | \$897   |

Cost of absenteeism = Median weekly earnings / 40 work hours per week × hours missed work in past 7 days in NHWS × 50 work weeks per year  
Cost of presenteeism = Median weekly earnings/40 work hours per week × (lost productivity while at work in NHWS/10) × hours worked in past 7 days in NHWS × 50 work weeks per year.  
Total indirect cost = sum of cost of absenteeism and cost of presenteeism. USD, United-States.

**Table S5.** Unadjusted results showing association between cost and insomnia severity.

|                                | Severe Insomnia |           |            | Moderate Insomnia |           |           | Mild (Subthreshold) Insomnia |           |           | No Clinically Significant Insomnia |           |           | <i>p</i> Value |
|--------------------------------|-----------------|-----------|------------|-------------------|-----------|-----------|------------------------------|-----------|-----------|------------------------------------|-----------|-----------|----------------|
|                                | <i>n</i>        | Mean      | SD         | <i>n</i>          | Mean      | SD        | <i>n</i>                     | Mean      | SD        | <i>n</i>                           | Mean      | SD        |                |
| Cost of Absenteeism            | 1205            | 8607.84   | 13,252.79  | 3774              | 5541.07   | 10,952.57 | 8127                         | 2740.91   | 7557.81   | 3996                               | 1557.33   | 6237.97   | <0.001         |
| Cost of Presenteeism           | 1205            | 12,187.76 | 13,863.82  | 3776              | 11,797.50 | 13,075.96 | 8134                         | 8152.18   | 11,061.37 | 4002                               | 4808.92   | 8998.88   | <0.001         |
| Total Indirect Costs (\$)      | 1205            | 20,795.61 | 19,798.23  | 3776              | 17,335.63 | 17,769.73 | 8134                         | 10,890.73 | 14,400.95 | 4002                               | 6363.91   | 11,974.06 | <0.001         |
| Cost of Doctor Visits          | 2030            | 4819.57   | 6757.65    | 6873              | 3895.25   | 5256.51   | 14,155                       | 2972.22   | 4189.54   | 7534                               | 2732.53   | 3338.15   | <0.001         |
| Cost of ER Visits              | 2030            | 3311.68   | 7293.18    | 6873              | 1439.72   | 4386.22   | 14,155                       | 754.30    | 3026.29   | 7534                               | 426.13    | 2251.70   | <0.001         |
| Cost of Hospitalization Visits | 2030            | 39,283.70 | 162,353.02 | 6873              | 13,004.72 | 62,839.89 | 14,155                       | 6628.02   | 38,961.95 | 7534                               | 5101.53   | 56,611.87 | <0.001         |
| Total Direct Costs (\$)        | 2030            | 47,414.94 | 167,047.36 | 6873              | 18,339.69 | 66,509.57 | 14,155                       | 10,354.54 | 41,532.04 | 7534                               | 8260.19   | 58,022.48 | <0.001         |
| Total Costs (\$)               | 2030            | 59,759.13 | 169,878.12 | 6873              | 27,863.82 | 70,063.15 | 14,155                       | 16,612.77 | 44,574.89 | 7534                               | 11,640.65 | 60,071.20 | <0.001         |

Abbreviations: ER, emergency room; SD, standard deviation.

**Table S6.** Adjusted results showing association between cost and insomnia severity.

|                                     | Severe Insomnia |         |                     |       | Moderate Insomnia |        |                     |       | Mild (Subthreshold) Insomnia |        |                     |       | No Clinically Significant Insomnia |        |                   |    | <i>p</i> Value |
|-------------------------------------|-----------------|---------|---------------------|-------|-------------------|--------|---------------------|-------|------------------------------|--------|---------------------|-------|------------------------------------|--------|-------------------|----|----------------|
|                                     | Mean            | SE      | CI                  | RR    | Mean              | SE     | CI                  | RR    | Mean                         | SE     | CI                  | RR    | Mean                               | SE     | CI                | RR |                |
| Cost of Absenteeism (\$)            | 6104.19         | 639.57  | 4971.00–7495.71     | 4.633 | 4256.29           | 244.53 | 3803.02–4763.59     | 3.231 | 2292.66                      | 87.50  | 2127.41–2470.74     | 1.740 | 1317.49                            | 73.26  | 1181.45–1469.19   | 1  | <0.001         |
| Cost of Presenteeism (\$)           | 10,404.80       | 481.41  | 9502.76–11,392.46   | 2.213 | 10,719.15         | 269.14 | 10,204.42–11,259.84 | 2.280 | 7770.21                      | 129.05 | 7521.36–8027.30     | 1.653 | 4701.13                            | 115.56 | 4480.01–4933.16   | 1  | <0.001         |
| Total Indirect Costs (\$)           | 16,799.20       | 762.64  | 15,369.02–18,362.47 | 2.764 | 15,213.09         | 376.24 | 14,493.27–15,968.67 | 2.503 | 10,174.38                    | 166.50 | 9853.22–10,506.01   | 1.674 | 6078.45                            | 146.61 | 5797.78–6372.70   | 1  | <0.001         |
| Cost of Doctor Visits (\$)          | 3658.59         | 109.34  | 3450.44–3879.29     | 1.313 | 3121.61           | 49.85  | 3025.41–3220.87     | 1.120 | 2774.58                      | 29.77  | 2716.85–2833.55     | .996  | 2786.59                            | 43.20  | 2703.20–2872.55   | 1  | <0.001         |
| Cost of ER Visits (\$)              | 1468.10         | 130.54  | 1233.29–1747.61     | 3.793 | 851.28            | 40.36  | 775.74–934.16       | 2.199 | 558.79                       | 17.95  | 524.70–595.09       | 1.444 | 387.05                             | 17.81  | 353.67–423.59     | 1  | <0.001         |
| Cost of Hospitalization Visits (\$) | 12,117.63       | 1563.19 | 9410.47–15,603.56   | 3.478 | 6758.16           | 463.17 | 5908.70–7729.75     | 1.940 | 4245.36                      | 197.45 | 3875.49–4650.54     | 1.219 | 3483.93                            | 230.98 | 3059.40–3967.36   | 1  | <0.001         |
| Total Direct Costs (\$)             | 20,032.28       | 1488.50 | 17,317.36–23,172.82 | 2.833 | 11,769.43         | 464.61 | 10,893.15–12,716.20 | 1.664 | 8181.03                      | 219.00 | 7762.87–8621.72     | 1.157 | 7071.77                            | 270.31 | 6561.33–7621.91   | 1  | <0.001         |
| Total Cost (\$)                     | 27,051.20       | 1596.11 | 24,096.99–30,367.59 | 2.666 | 18,458.63         | 581.33 | 17,353.71–19,633.91 | 1.819 | 13,054.89                    | 278.39 | 12,520.49–13,612.09 | 1.286 | 10,148.45                          | 309.52 | 9559.58–10,773.59 | 1  | <0.001         |

Abbreviations: CI, Confidence Interval; ER, emergency room; RR, rate ratio; SE, standard error.

## References

1. Walters, S.J.; Brazier, J.E. Comparison of the minimally important difference for two health state utility measures: EQ-5D and SF-6D. *Qual. Life Res.* **2005**, *14*, 1523–1532. <https://doi.org/10.1007/s11136-004-7713-0>.
2. DiBonaventura, M.D.; Gupta, S.; McDonald, M.; Sadosky, A. Evaluating the health and economic impact of osteoarthritis pain in the workforce: Results from the National Health and Wellness Survey. *BMC Musculoskelet. Disord.* **2011**, *12*, 83. <https://doi.org/10.1186/1471-2474-12-83>. PMID: 21527024; PMCID: PMC3110556.
